# Supplementary material for: Diversity of Bacteria Exhibiting Bile Acid-inducible 7α-dehydroxylation Genes in the Human Gut
Source: PubMed Central journal article supplement — Comput Struct Biotechnol J. 2019 Jul 26;17:1016–9. doi: 10.1016/j.csbj.2019.07.012 (PMC6692061; doi:10.1016/j.csbj.2019.07.012), 2019-07-26
Supplement: mmc2.pdf [file mmc2.pdf]

| Name                                         | Identity (%) | A. length (%) | Description                              |
|----------------------------------------------|--------------|---------------|------------------------------------------|
| Clostridiales bacterium VE202-26             | 91           | 404           | L-threonine ammonia-lyase                |
| Clostridium scindens VE202-05                | 91           | 404           | L-threonine ammonia-lyase                |
| Yw_2015__SZAXPI017595-169__bin.30            | 91           | 404           | L-threonine ammonia-lyase                |
| ERR1018198__bin.24                           | 91           | 404           | L-threonine ammonia-lyase                |
| Lachnoclostridium nov. ERR1204033            | 91           | 404           | L-threonine ammonia-lyase                |
| Lachnoclostridium nov. ERR1203939            | 91           | 404           | L-threonine ammonia-lyase                |
| LomanNJ_2013__OBK1196__bin.13                | 90           | 404           | L-threonine ammonia-lyase                |
| Lachnoclostridium nov. ERR171273             | 90           | 404           | L-threonine ammonia-lyase                |
| Lachnospiraceae bacterium 5_1_57FAA          | 90           | 404           | L-threonine ammonia-lyase                |
| SRR5275456__bin.18                           | 90           | 404           | L-threonine ammonia-lyase                |
| Clostridium scindens ATCC 35704              | 90           | 404           | L-threonine ammonia-lyase                |
| Clostridium sp. Marseille-P2538              | 57           | 406           | putative protein                         |
| Clostridium sp. AF15-17LB                    | 33           | 415           | putative protein                         |
| QinJ_2012__T2D-092__bin.53                   | n.d.         | -             | -                                        |
| Dorea sp. D27                                | 33           | 396           | putative protein                         |
| Clostridium hylemonae DSM 15053              | 100          | 404           | L-threonine ammonia-lyase                |
| SRR5077148__bin.27                           | 56           | 407           | putative protein                         |
| Dorea formicigenerans AF12-11                | 53           | 409           | putative protein                         |
| Dorea longicatena AF17-8AC                   | 59           | 406           | putative protein                         |
| Lachnoclostridium nov. ERR1022388            | 32           | 409           | putative protein                         |
| Eubacterium sp. strain Z7895TDY5834872       | 32           | 409           | putative protein                         |
| LoombaR_2017__SID5395_kej__bin.39            | 32           | 409           | putative protein                         |
| Lachnoclostridium nov. ERR1022276            | 49           | 409           | putative protein                         |
| Ruminococcus sp. strain Z7895TDY5608817      | 49           | 409           | putative protein                         |
| Lachnoclostridium nov. ERR2230109            | 49           | 409           | putative protein                         |
| Dorea sp. AF36-15AT                          | 33           | 409           | putative protein                         |
| Dorea sp. AMS8-8                             | 49           | 258           | putative protein                         |
| ERR1620300__bin.15                           | 49           | 409           | putative protein                         |
| Obregon-TitoAJ_2015__NO11__bin.28            | 51           | 410           | putative protein                         |
| SRR2726136__bin.31                           | 86           | 403           | L-threonine ammonia-lyase                |
| LoombaR_2017__SID5639_uuc__bin.37            | 87           | 403           | L-threonine ammonia-lyase                |
| Lachnoclostridium nov. ERR1022434            | 33           | 413           | putative protein                         |
| Romboutsia nov. ERR1022465                   | 31           | 408           | putative protein                         |
| Clostridium sp. strain Z7895TDY5834951       | 31           | 408           | putative protein                         |
| Romboutsia nov. ERR1022466                   | 31           | 408           | putative protein                         |
| Paeniclostridium sordellii AF05-25           | 43           | 397           | L-threonine dehydratase catabolic TdcB   |
| Clostridium sordellii VPI 9048               | 43           | 397           | L-threonine dehydratase catabolic TdcB   |
| Peptoclostridium difficile ERR2221219        | 43           | 397           | L-threonine dehydratase catabolic TdcB   |
| ERR1190714__bin.6                            | 30           | 410           | putative protein                         |
| QinJ_2012__CON-102__bin.13                   | 30           | 410           | putative protein                         |
| Romboutsia sp. MT17                          | 32           | 409           | putative protein                         |
| Romboutsia nov. ERR1022375                   | 42           | 397           | L-threonine dehydratase catabolic TdcB   |
| Intestinibacter bartlettii ERR1022418        | 28           | 244           | Diaminopropionate ammonia-lyase          |
| Terrisporobacter mayombei ERR2221147         | 41           | 402           | L-threonine ammonia-lyase                |
| Peptoclostridium difficile ERR2221225        | 29           | 395           | putative protein                         |
| QinN_2014__LD-84__bin.30                     | 32           | 409           | putative protein                         |
| Peptoclostridium sp. AF21-18                 | 32           | 409           | putative protein                         |
| SRR2912789__bin.15                           | 32           | 409           | putative protein                         |
| ERR526064__bin.3                             | 32           | 409           | putative protein                         |
| SRR2912788__bin.43                           | 32           | 409           | putative protein                         |
| ERR1190593__bin.31                           | 42           | 402           | L-threonine ammonia-lyase                |
| Clostridium hiranonis DSM 13275              | 32           | 409           | putative protein                         |
| FengQ_2015__SID530348__bin.18                | 42           | 402           | L-threonine ammonia-lyase                |
| ERR1620278__bin.11                           | 28           | 427           | putative protein                         |
| Proteocatella sphenisci DSM 23131            | 45           | 397           | L-threonine ammonia-lyase                |
| GeversD_2014__SKBSTL008__bin.71              | 30           | 405           | putative protein                         |
| SRR6028174__bin.3                            | 30           | 405           | putative protein                         |
| ERR1305903__bin.25                           | 41           | 393           | L-threonine ammonia-lyase                |
| ERR1018212__bin.42                           | 40           | 402           | putative protein                         |
| CosteaPI_2017__SID713A002-11-0-0__bin.25     | 37           | 312           | L-threonine dehydratase catabolic TdcB   |
| ERR1305892__bin.4                            | 39           | 312           | L-threonine dehydratase catabolic TdcB   |
| Firmicutes bacterium CAG:103                 | 30           | 405           | putative protein                         |
| ERR1297716__bin.14                           | 40           | 402           | putative protein                         |
| CosteaPI_2017__SID713B026-11-90-0__bin.59    | 29           | 404           | putative protein                         |
| SRR3737028__bin.26                           | 30           | 405           | putative protein                         |
| SchirmerM_2016__G89065__bin.22               | 41           | 393           | L-threonine ammonia-lyase                |
| SRR5057034__bin.63                           | 40           | 395           | L-threonine ammonia-lyase                |
| CosteaPI_2017__SID713A023-11-0-0__bin.14     | 41           | 402           | putative protein                         |
| ERR1305880__bin.25                           | 38           | 306           | L-threo-3-hydroxyaspartate ammonia-lyase |
| ERR1190589__bin.37                           | 37           | 306           | L-threo-3-hydroxyaspartate ammonia-lyase |
| ERR688523__bin.66                            | 40           | 395           | L-threonine ammonia-lyase                |
| SRR5091468__bin.55                           | 41           | 402           | putative protein                         |
| XieH_2016__YSZC12003_37181R1__bin.102        | 35           | 406           | putative protein                         |
| Obregon-TitoAJ_2015__SM11__bin.2             | 38           | 397           | L-threonine ammonia-lyase                |
| SRR1761702__bin.21                           | 38           | 397           | L-threonine ammonia-lyase                |
| KarlssonFH_2013__S54__bin.27                 | 31           | 402           | putative protein                         |
| Clostridiales bacterium UBA5888              | 37           | 399           | L-threonine ammonia-lyase                |
| Clostridiales bacterium UBA4701              | 40           | 363           | putative protein                         |
| Clostridiales bacterium UBA6412              | 37           | 399           | L-threonine ammonia-lyase                |
| RaymondF_2016__P6CO__bin.19                  | 41           | 404           | putative protein                         |
| XieH_2016__YSZC12003_36474__bin.34           | 31           | 411           | putative protein                         |
| CosteaPI_2017__SID713B072-11-0-0__bin.31     | 39           | 405           | putative protein                         |
| Clostridiales bacterium UBA1701              | 41           | 393           | L-threonine ammonia-lyase                |
| SRR2992893__bin.21                           | 41           | 393           | L-threonine ammonia-lyase                |
| FengQ_2015__SID31866__bin.65                 | 41           | 393           | L-threonine ammonia-lyase                |
| XieH_2016__YSZC12003_35390__bin.5            | 33           | 407           | putative protein                         |
| Lij_2014__MH0358__bin.56                     | 29           | 403           | putative protein                         |
| ERR414305__bin.35                            | 29           | 403           | putative protein                         |
| Clostridiales bacterium UBA7103              | 42           | 393           | L-threonine ammonia-lyase                |
| RaymondF_2016__P2E7__bin.68                  | 42           | 398           | L-threonine ammonia-lyase                |
| RaymondF_2016__P21E7__bin.22                 | 38           | 403           | putative protein                         |
| FengQ_2015__SID531416__bin.49                | 41           | 395           | L-threonine ammonia-lyase                |
| SRR2155369__bin.7                            | 36           | 403           | putative protein                         |
| VogtmannE_2016__MMRS15137911ST-27-0-0__bin.3 | 36           | 403           | putative protein                         |
| ERR1913015__bin.15                           | 40           | 396           | L-threonine ammonia-lyase                |
| FengQ_2015__SID31866__bin.46                 | 30           | 406           | putative protein                         |
| SRR2155387__bin.7                            | 38           | 406           | putative protein                         |
| Ruminococcaceae bacterium TF06-43            | n.d.         | -             | -                                        |
| ERR589534__bin.49                            | n.d.         | -             | -                                        |
| Oscillibacter nov. ERR1022407                | 47           | 319           | L-threonine ammonia-lyase                |
| Intestinimonas butyriciproducens ERR1022450  | 62           | 399           | L-threonine ammonia-lyase                |
| Pseudoflavonifractor capillosus ERR1022447   | 63           | 399           | L-threonine ammonia-lyase                |
| Pseudoflavonifractor sp. AF19-9AC            | 32           | 409           | putative protein                         |
| SRR2912810__bin.38                           | 40           | 403           | putative protein                         |
| Ruminococcaceae bacterium AM07-15            | 33           | 412           | putative protein                         |
| Ruminococcaceae bacterium AM28-23LB          | n.d.         | -             | -                                        |
