# Supplementary figures and images for: Diversity of Bacteria Exhibiting Bile Acid-inducible 7α-dehydroxylation Genes in the Human Gut
Source: PubMed Central journal article supplement — Comput Struct Biotechnol J. 2019 Jul 26;17:1016–9. doi: 10.1016/j.csbj.2019.07.012 (PMC6692061; doi:10.1016/j.csbj.2019.07.012), 2019-07-26

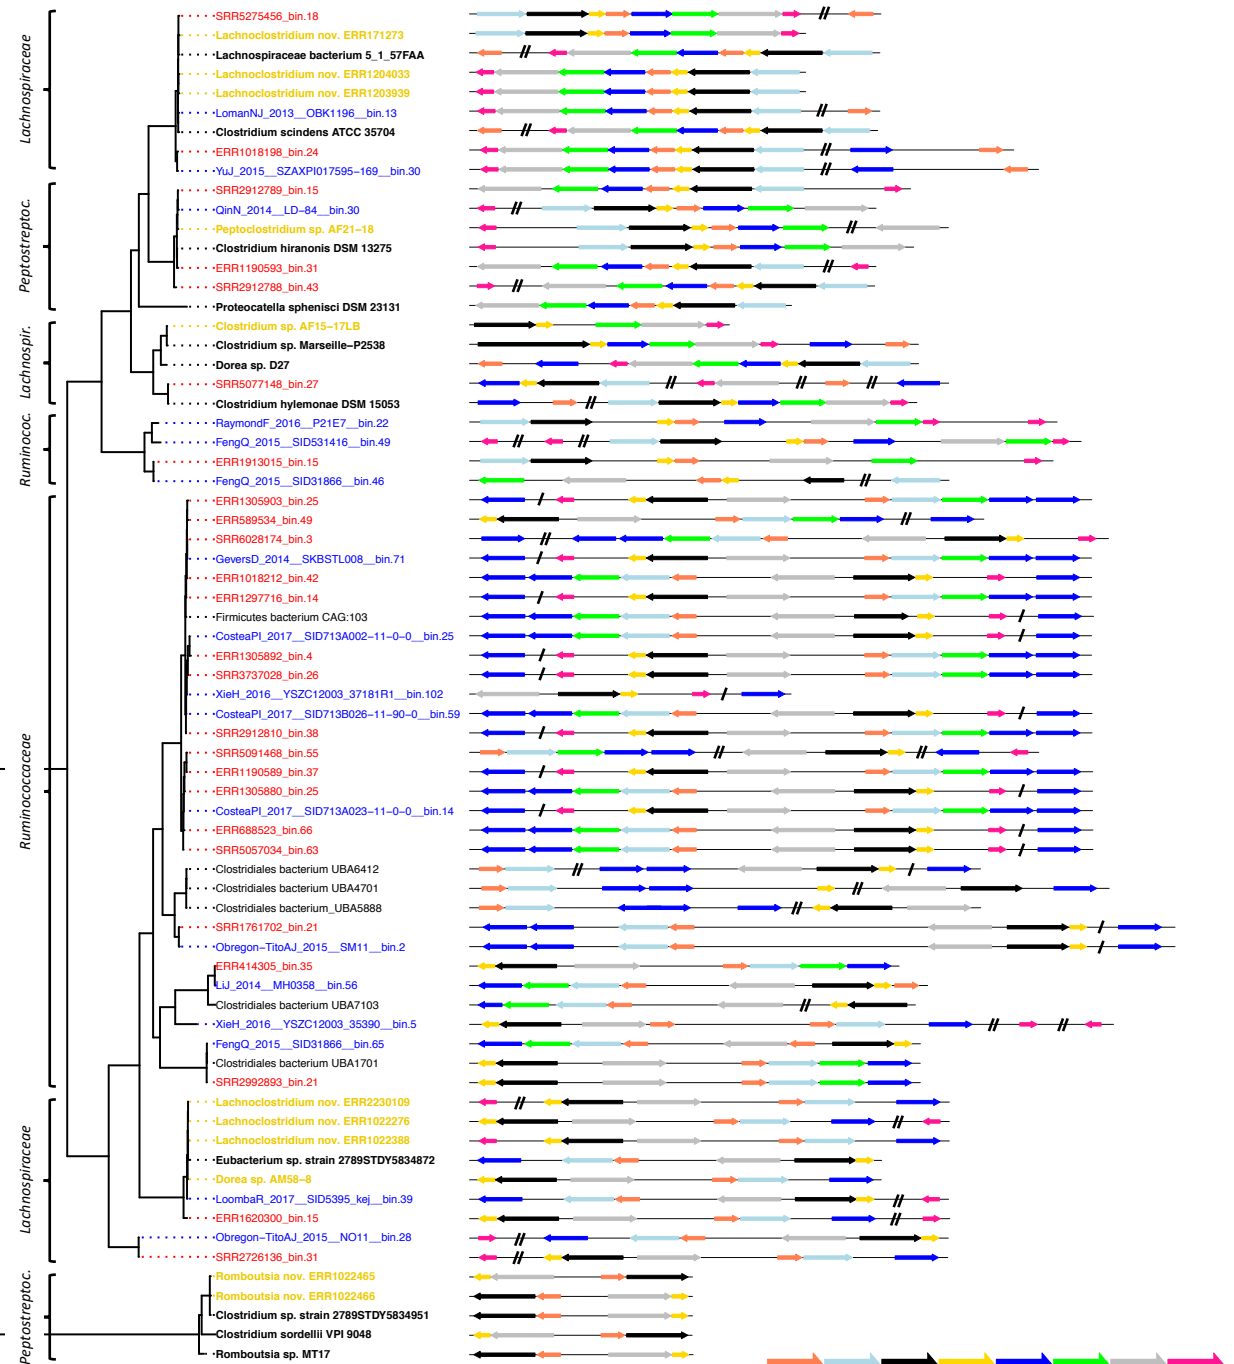

0.05

*baiA* *baiB* *baiCD* *baiE* *baiF* *baiG* *baiH* *baiI*

Supplement: mmc1.pdf [file mmc1.pdf]
